# Supplementary material for: Citrus Essential Oils in Aromatherapy: Therapeutic Effects and Mechanisms
Source: MDPI journal article supplement (doi:10.3390/antiox11122374), 2022-11-30
Supplement: s1 [file s1]

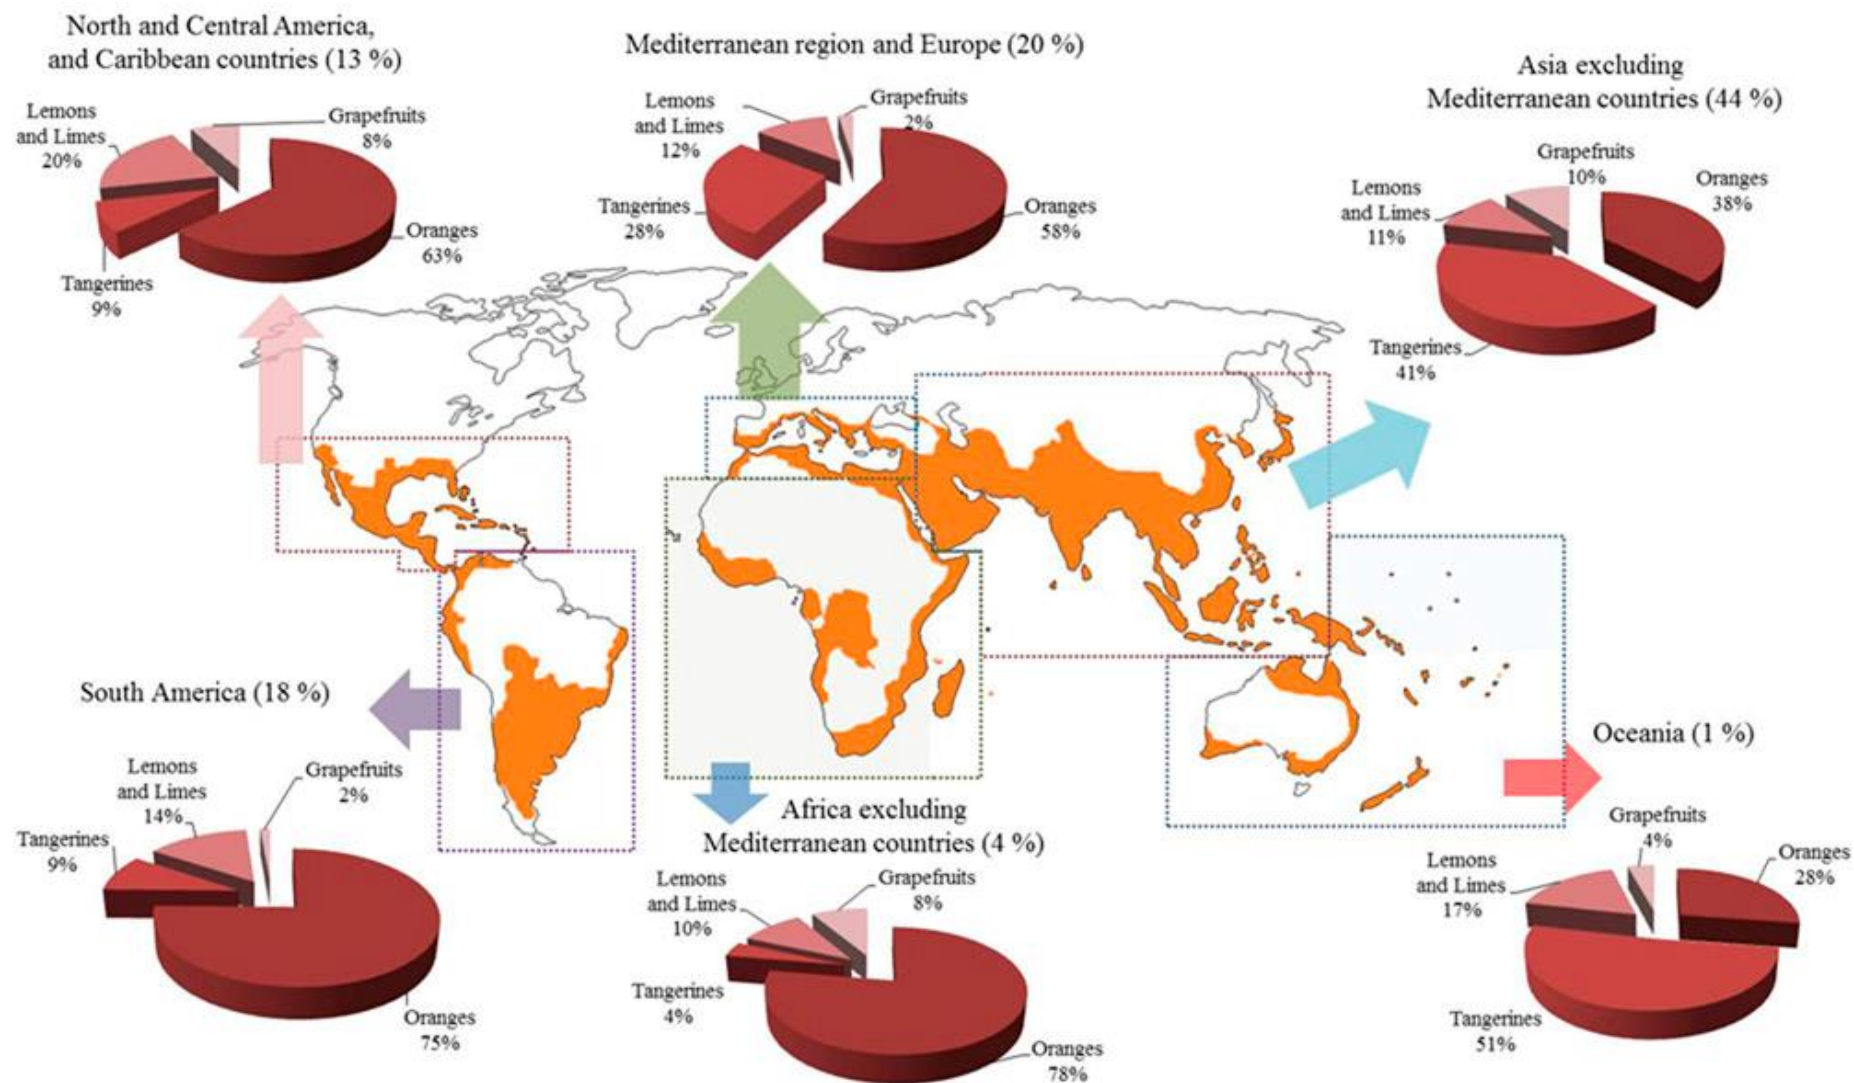

**Figure S1:** Climate sustainability and the annual production of citrus fruits in different geographical regions across the globe [212].

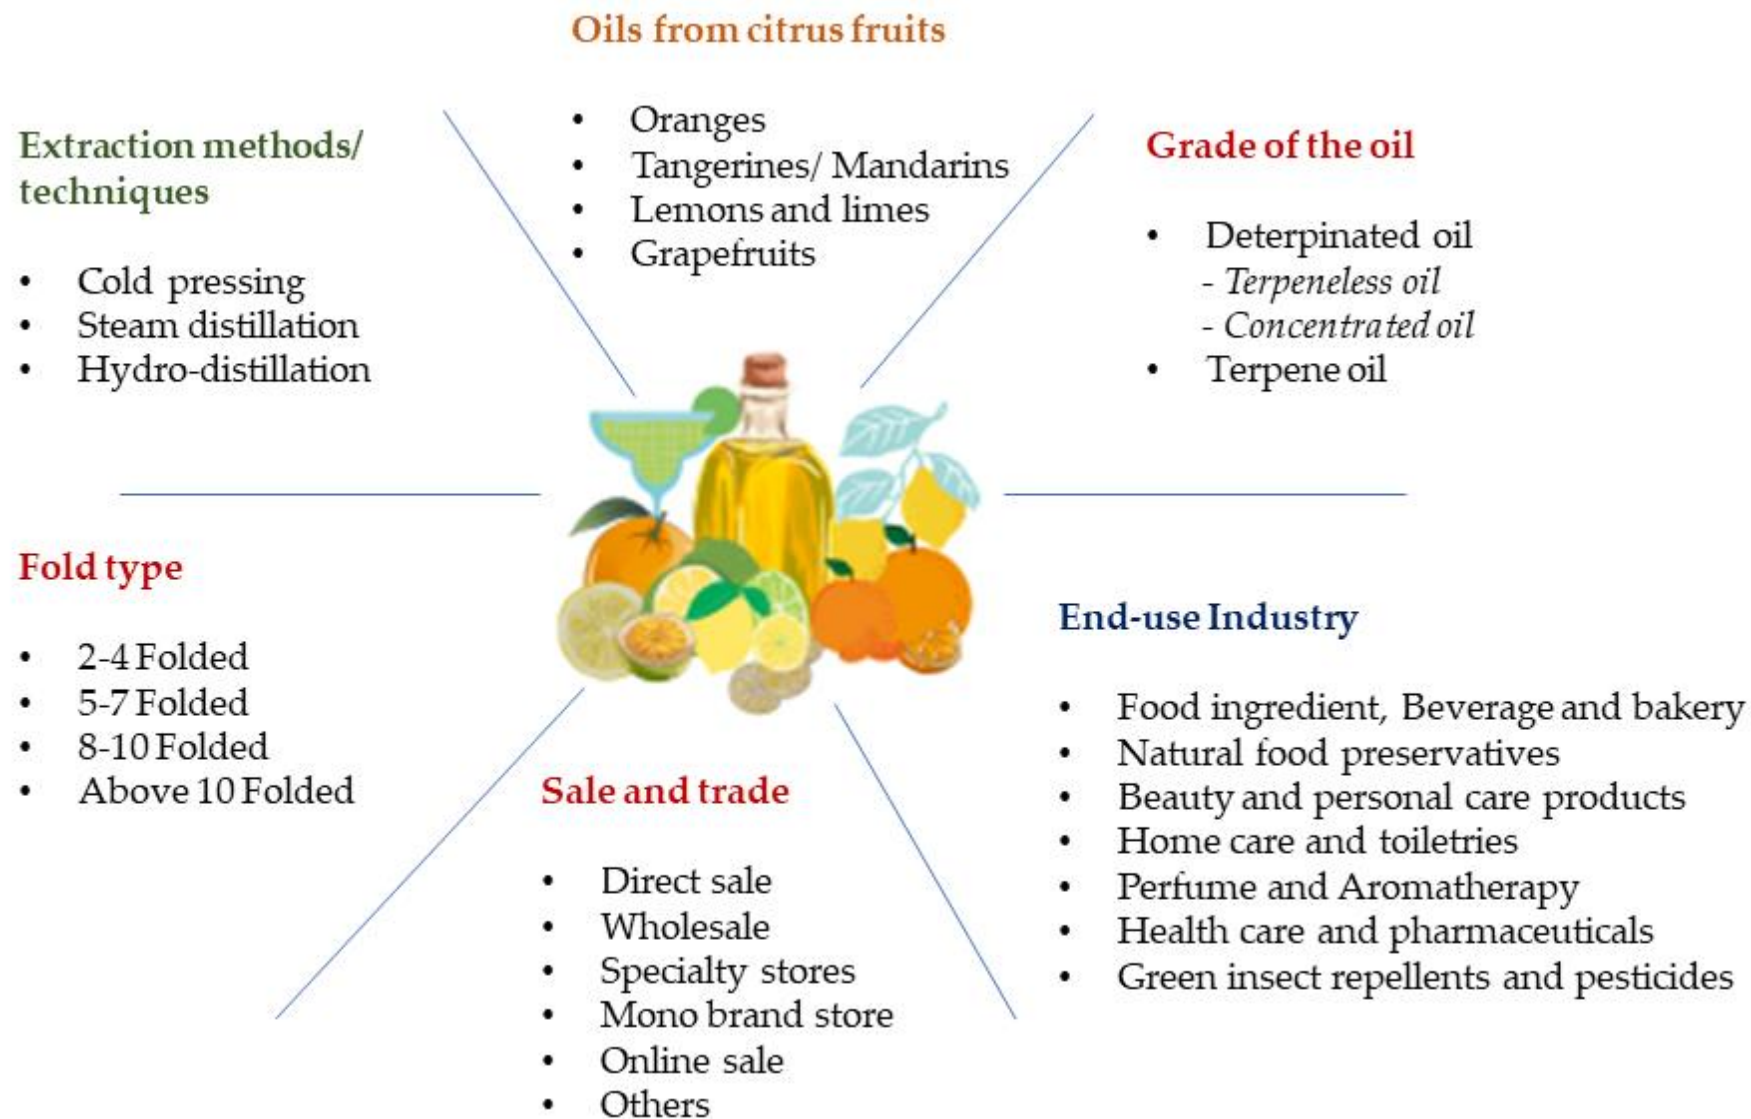

Figure S2: Market segmentation of citrus essential oils.

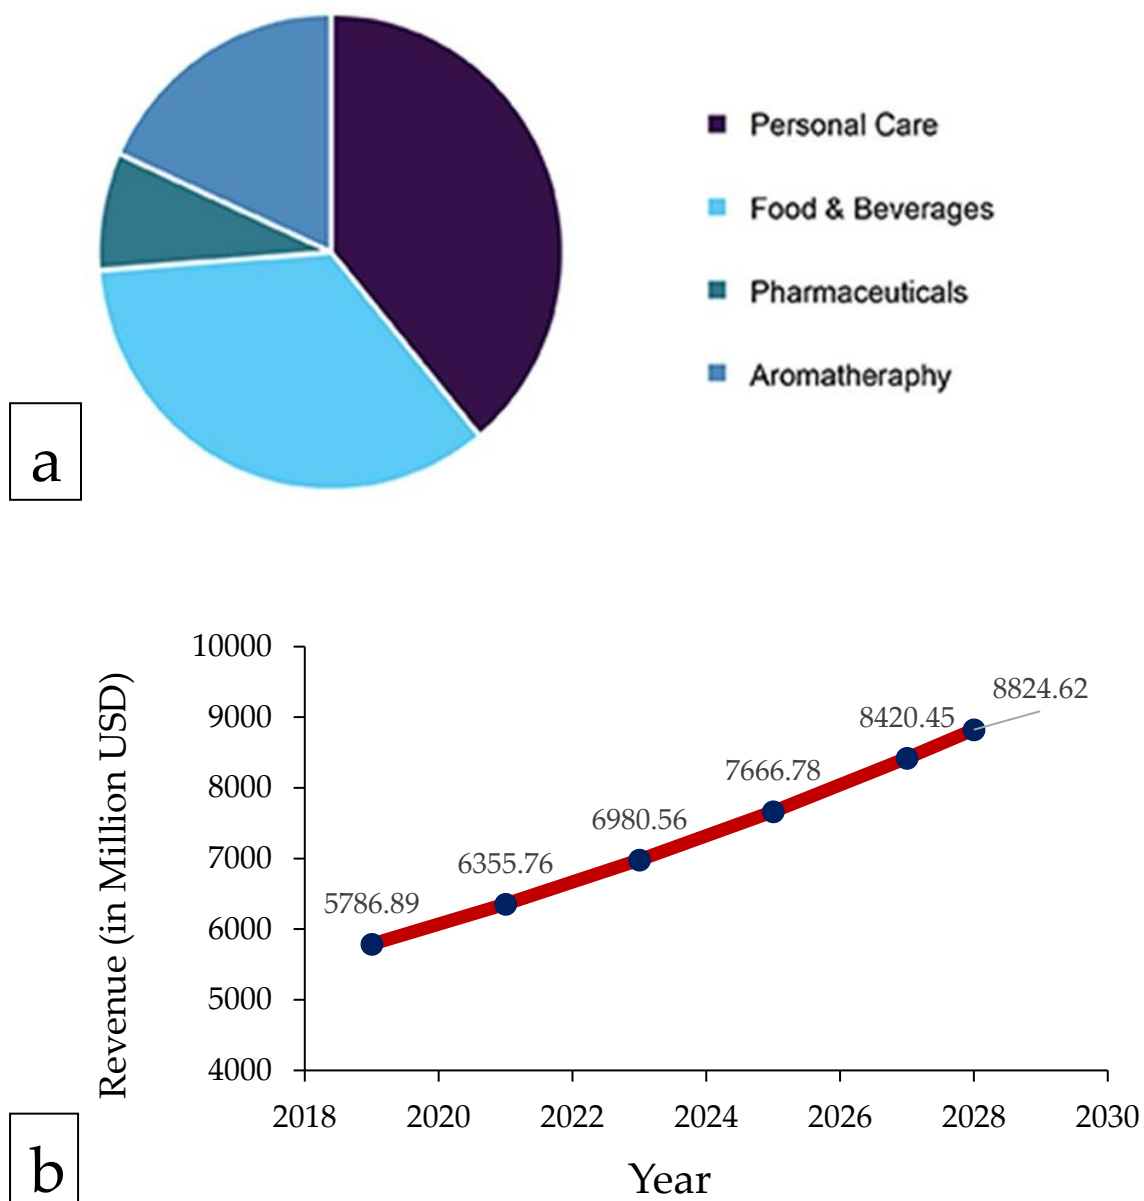

**Figure S3 (a)** Global citrus oil market by application, by the year 2018 [22,24]; **(b)** Citrus essential oil market value forecast (Citrus Oil Market by Product Type, 2022) [212].

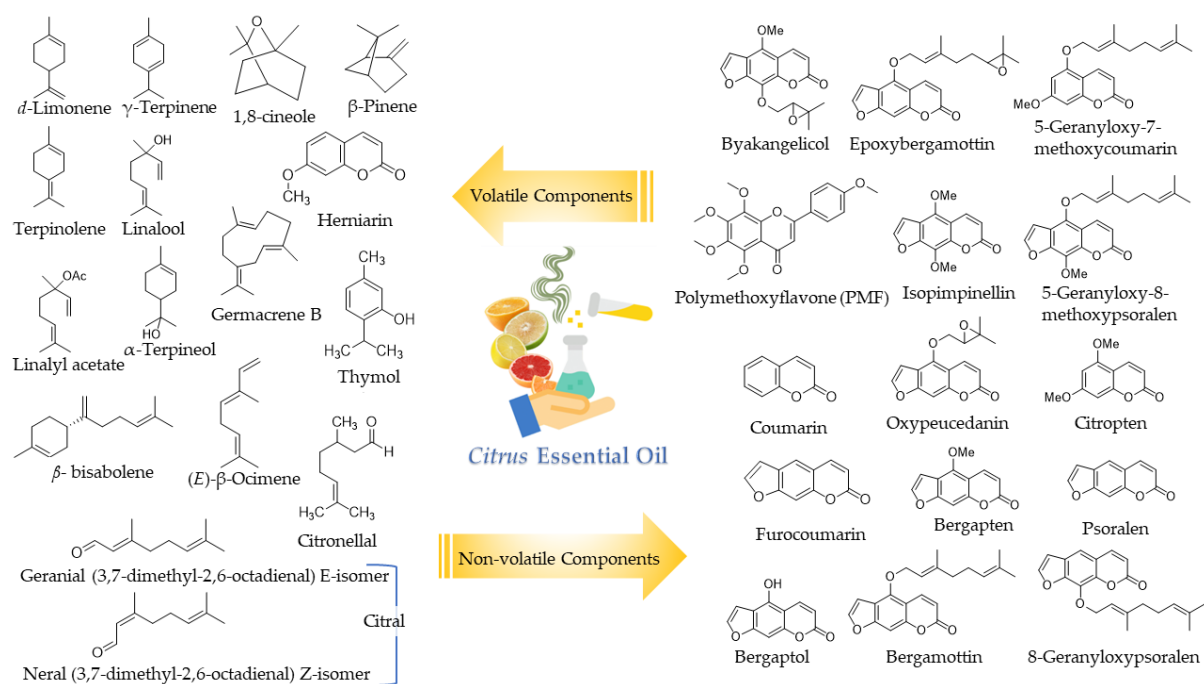

**Figure S4.** Molecular structures of the volatile and non-volatile components present in *Citrus* EOs.

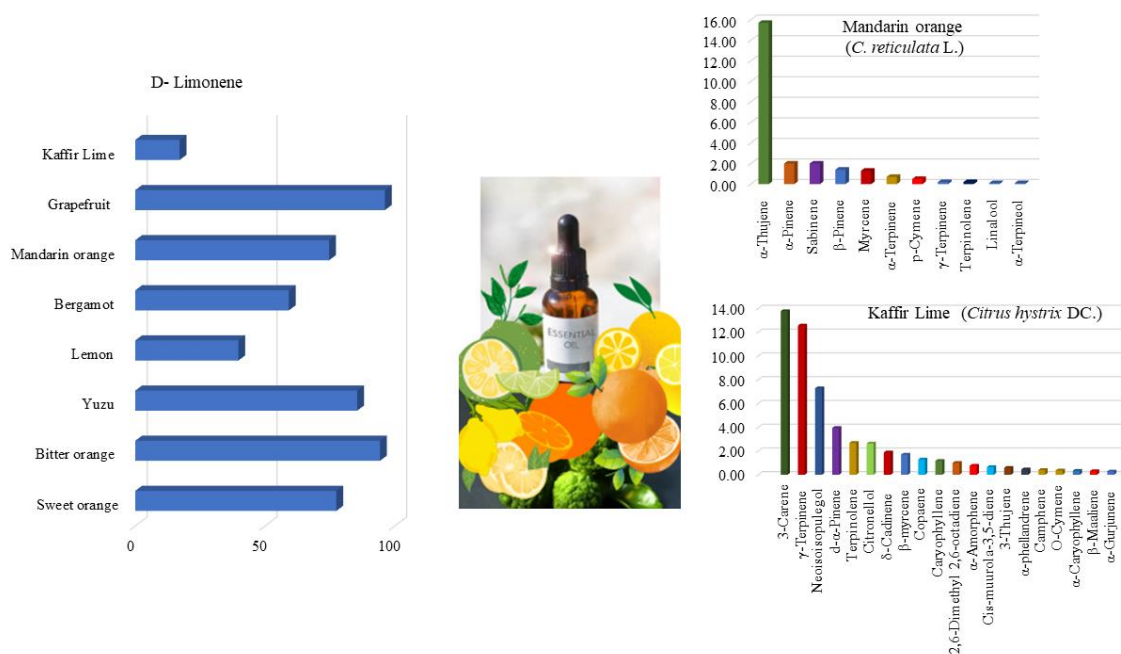

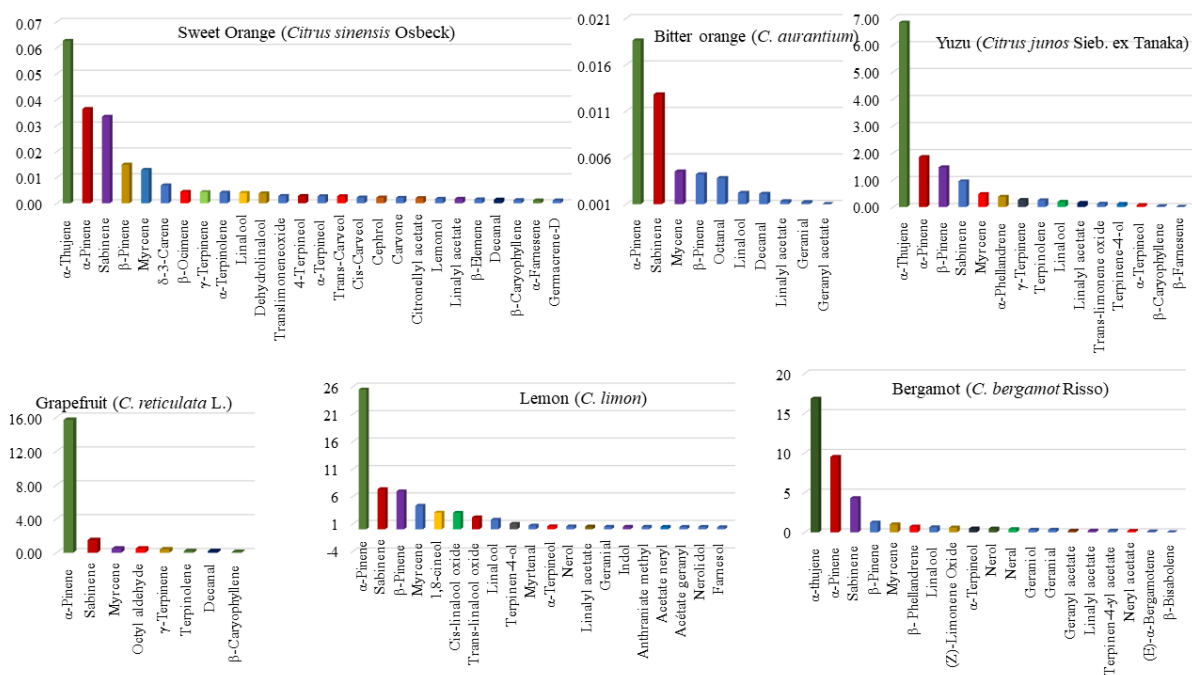

Figure S5. Composition of EOs in different *Citrus* varieties [3,14].

**Table S1.** Methods/ Techniques of extracting *Citrus* essential oils [4].

#### Hydro-distillation

Plant materials packed in a still compartment; water is added and brought to boil, or steam is directly injected into the plant sample; condensed mixture flows through condenser to a separator, where oil and bioactive compounds separate automatically from the water. Performed before dehydration of plant materials.

#### Cold Pressing

The peels are lacerated, across using mechanical pressure and oil flows; the oil is carried down to a decantation vessel in a stream of water; the emulsion collected and separated by centrifugation. The essential oil collected, dried over anhydrous sodium sulphate and stored at 4 °C.

#### Microwave Hydro-diffusion and Gravity

It combines microwave heating and gravity working at atmospheric pressure. The plant material is directly placed in a microwave reactor without solvent or water; heating is applied to rupture of the glands and cell receptacles; the extract diffuses outside the plant tissues; the extract drops under gravity out of the microwave reactor through the perforated Pyrex disc.

#### Microwave Steam (dry) Distillation

Fresh vegetable material is placed in a microwave reactor; internal heating of the water present in the plant material ruptures glands and oleiferous receptacles; the vapor passes through a condenser outside the microwave cavity; the distillate is collected continuously in a receiving flask.

#### Instant Controlled Pressure Drop Technique

The plant material is held under high pressure (0.08–1 MPa) for a short time (5–60 s); then the pressure is dropped instantly toward a vacuum (about 5 kPa); this results in auto evaporation of water, expansion, and rapid cooling of the product; the volatile material/ essential oil is extracted with in 1-4 min.

#### Steam Distillation

Food-grade solvents, viz., ethanol, benzene, dimethyl, or hexane are employed; plant material is treated with a low boiler solvent; the compounds transfer from one solvent to another owing to the difference in solubility between these two immiscible (or slightly soluble) solvents; the solvent is evaporated to obtain the desired compound.



**Table S2.** Methods/ techniques of characterization/authentication of *Citrus* essential oils.

| Characterization/Authentication Technique                                                                                                                | Particulars                                                                                                                 | References |
|----------------------------------------------------------------------------------------------------------------------------------------------------------|-----------------------------------------------------------------------------------------------------------------------------|------------|
| Gas Chromatography-Mass Spectrometry (GC-MS)                                                                                                             | Chemical composition and principal constituents of the citrus essential oil                                                 | [170]      |
| Multidimensional Gas Chromatography – Flame Ionization Detection (MDGC-GCFID)                                                                            | Determination of enantiomeric composition in Lemon peel                                                                     |            |
| Multidimensional Gas Chromatography – Flame Ionization Detection – Selected Ion Monitoring (MDGC-GC-MSSIM)                                               | Determination of enantiomeric excess of R-(C)-limonene in Lemon peel oil (97.1 and 97.4%)                                   | [213]      |
| Enantioselective Gas Chromatography (esGC) and Multidimensional Gas Chromatography (MDGC)                                                                | Enantiomeric composition and distribution in different <i>Citrus</i> EOs                                                    | [42]       |
| Simultaneous Distillation and Extraction (SDE)-GC-MS and MDGC-MS                                                                                         | Analysis of volatile flavor compounds of yuzu, lemon, and lime; Enantiomeric ratios of chiral and authentication of quality | [34]       |
| Supercritical Fluid Extraction GC-MS (SFE GC-MS) Involving Use of Multidimensional GC                                                                    | Extraction and determination of composition; separation of enantiomers                                                      | [214]      |
| Enantioselective capillary gas chromatography (enantio-cGC) and comparative isotope ratio mass spectrometry (IRMS), coupled on-line with conventional GC | Authenticity control of flavors and EOs                                                                                     | [215]      |
| Enantioselective Capillary Gas Chromatography and Isotope Ratio Mass Spectrometry, Coupled Online with Capillary Gas Chromatography on an HP5 Column     | Analysis and authenticity investigations of lemon ( <i>Citrus limon</i> ) EOs                                               | [216]      |
| Online Gas Chromatography Pyrolysis Isotope Ratio Mass Spectrometry (HRGC-P-IRMS)                                                                        | Authentication of the flavor compounds                                                                                      | [217]      |
| Isotope Ratio Mass Spectrometry Online Coupled with capillary Gas Chromatography (GC-Py-IRMS)                                                            | Authentication and genuineness of mandarin <i>Citrus reticulata</i> Blanco EOs                                              | [218]      |
| Enantioselective Gas Chromatography in Flavor and Fragrance Analysis                                                                                     | Authentication of fragrance compounds                                                                                       | [219]      |
| Headspace–Solid Phase Microextraction Coupled to GC– C–IRMS                                                                                              | Authentication of <i>Citrus</i> EOs                                                                                         | [36]       |

|                                                                                              |                                                                                |       |
|----------------------------------------------------------------------------------------------|--------------------------------------------------------------------------------|-------|
| Multi-Dimensional Gas Chromatography (MDGC) and GCC-IRMS                                     | Authentication of Neroli and lime oils and determine the level of adulteration | [35]  |
| Ultra-High Performance Liquid Chromatography–Time-of-Flight–Mass Spectrometry (UHPLC– TOFMS) | Fingerprinting for Lemon Oil                                                   | [37]  |
| ATR (attenuated total reflectance)/FTIR as well as NIR-FT Raman spectroscopy                 | Determination of composition of <i>Citrus</i> oils                             | [220] |
